# Supplementary material for: A theoretical investigation of the removal of methylated arsenic pollutants with silicon doped graphene
Source: Royal Society of Chemistry journal article supplement (doi:10.1039/c6ra03813a), 2016-01-01
Supplement: c6ra03813a1.pdf [file c6ra03813a1.pdf]

### Supporting Information

#### SiG–pollutant systems in an aqueous environment

**Table S1.** Geometrical parameters of the SiG-pollutant systems with explicit 15·H<sub>2</sub>O molecules, in addition to COSMO implicit solvent environment. Distances are in angstroms (Å).

| <i>Pollutant</i>                    |   | $d_{\text{Si-O1}}$ | $d_{\text{As-O1}}$ | $d_{\text{H-O1}}$ |
|-------------------------------------|---|--------------------|--------------------|-------------------|
| <b><i>SiG-MMA<sup>III</sup></i></b> | a | 1.74               | 2.27               | 1.04              |
|                                     | b | 1.73               | 2.12               | 1.04              |
|                                     | c | 1.73               | 2.18               | 1.04              |
| <b><i>SiG-DMA<sup>III</sup></i></b> | a | 1.71               | 2.37               | 1.02              |
|                                     | b | 1.69               | 2.13               | 1.56              |
| <b><i>SiG-MMA<sup>V</sup></i></b>   | a | 1.75               | 1.76               | 1.79              |
|                                     | b | 1.75               | 1.77               | 1.88              |
|                                     | c | 1.74               | 1.78               | 1.81              |
|                                     | d | 1.77               | 1.78               | 1.88              |
|                                     | e | 1.90               | 1.75               | -                 |
| <b><i>SiG-DMA<sup>V</sup></i></b>   | a | 1.72               | 1.79               | -                 |
|                                     | b | 1.71               | 1.84               | 1.84              |
|                                     | c | 1.71               | 1.74               | -                 |
| <b><i>SiG-DMMTA<sup>V</sup></i></b> | a | 1.74               | 1.80               | 1.83              |
|                                     | b | 2.27               | 2.22               | 1.67              |

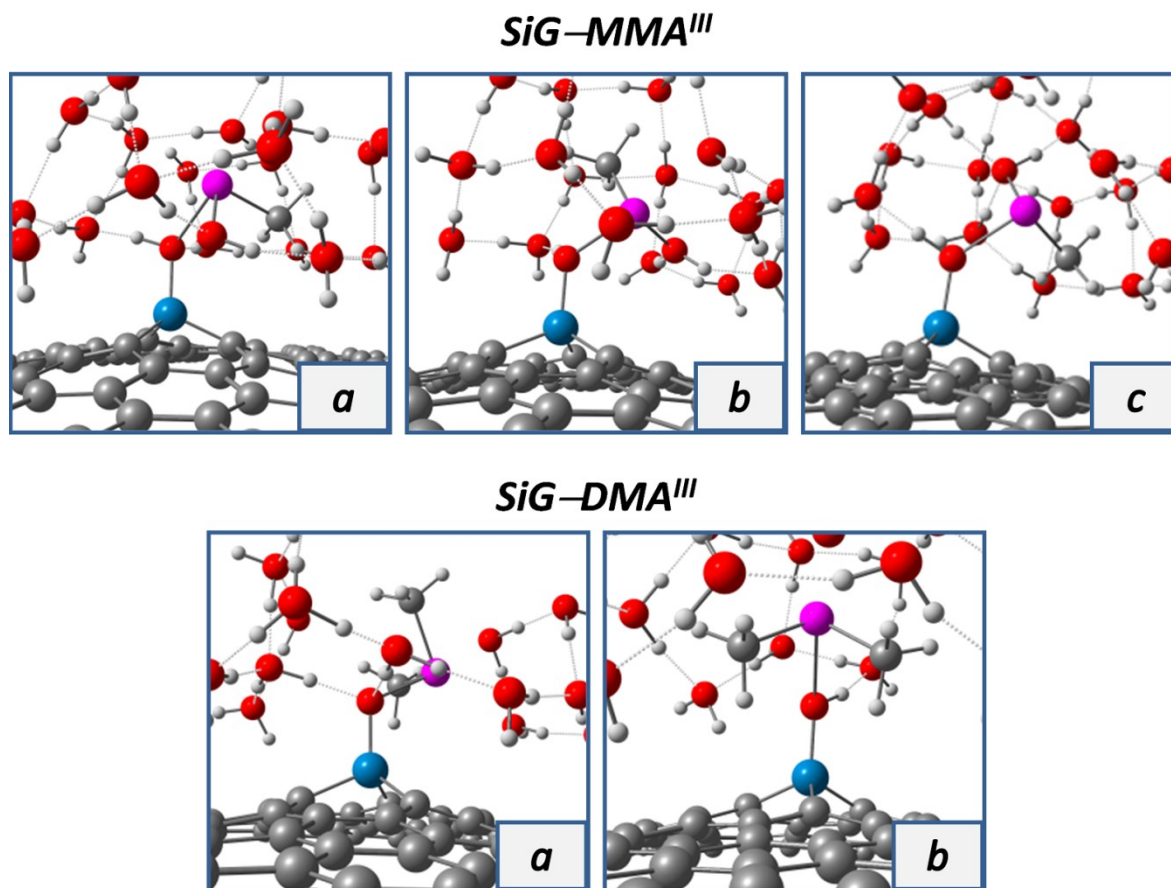

**Fig. S1** Minimum energy conformations of MMA<sup>III</sup> and DMA<sup>III</sup> adsorbed onto SiG in a solvent environment; the pollutants are surrounded by 15 H<sub>2</sub>O molecules with pointed hydrogen bonds.

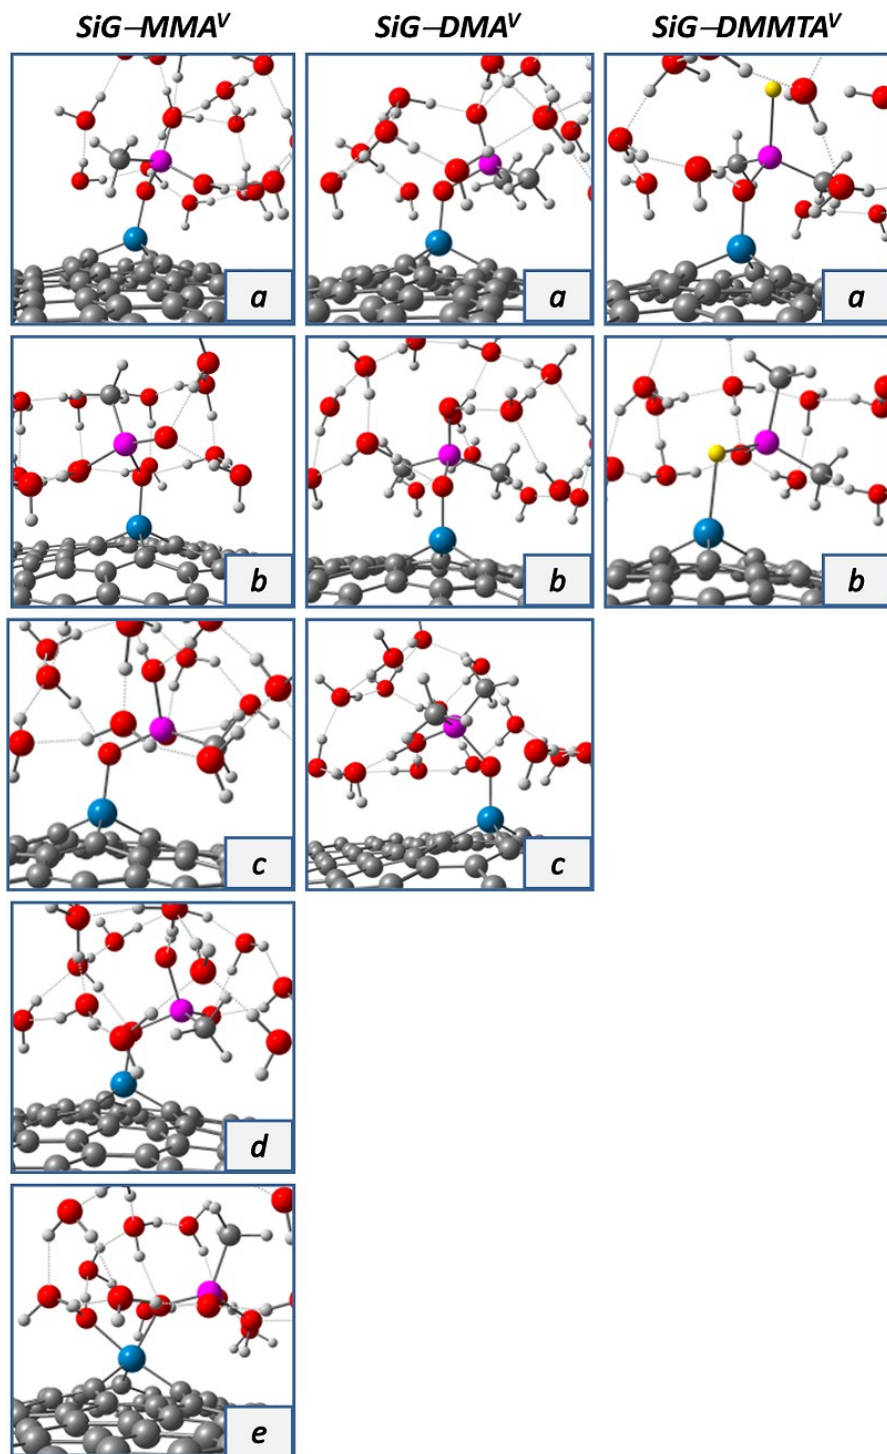

**Fig. S2** Minimum energy conformations of MMA<sup>V</sup>, DMA<sup>V</sup> and DMMTA<sup>V</sup> adsorbed onto SiG in a solvent environment; the pollutants are surrounded by 15 H<sub>2</sub>O molecules with pointed hydrogen bonds.
